# ProLIF – quantitative integrin protein–protein interactions and synergistic membrane effects on proteoliposomes

Nicola De Franceschi<sup>1,2,3,\*</sup>, Mitro Miihkinen<sup>1,\*</sup>, Hellyeh Hamidi<sup>1</sup>, Jonna Alanko<sup>1</sup>, Anja Mai<sup>1</sup>, Laura Picas<sup>4</sup>, Camilo Guzmán<sup>1</sup>, Daniel Lévy<sup>4</sup>, Peter Mattjus<sup>5</sup>, Benjamin T. Goult<sup>6</sup>, Bruno Goud<sup>4</sup> and Johanna Ivaska<sup>1,7,‡</sup>

## ABSTRACT

Integrin transmembrane receptors control a wide range of biological interactions by triggering the assembly of large multiprotein complexes at their cytoplasmic interface. Diverse methods have been used to investigate interactions between integrins and intracellular proteins, and predominantly include peptide-based pulldowns and biochemical immuno-isolations from detergent-solubilised cell lysates. However, quantitative methods to probe integrin–protein interactions in a more biologically relevant context where the integrin is embedded within a lipid bilayer have been lacking. Here, we describe ‘protein–liposome interactions by flow cytometry’ (denoted ProLIF), a technique to reconstitute recombinant integrin transmembrane domains (TMDs) and cytoplasmic tail (CT) fragments in liposomes as individual subunits or as  $\alpha\beta$  heterodimers and, via flow cytometry, allow rapid and quantitative measurement of protein interactions with these membrane-embedded integrins. Importantly, the assay can analyse binding of fluorescent proteins directly from cell lysates without further purification steps. Moreover, the effect of membrane composition, such as PI(4,5)P<sub>2</sub> incorporation, on protein recruitment to the integrin CTs can be analysed. ProLIF requires no specific instrumentation and can be applied to measure a broad range of membrane-dependent protein–protein interactions with the potential for high-throughput/multiplex analyses.

This article has associated First Person interviews with the first authors of the paper (see doi: 10.1242/jcs.223644 and doi: 10.1242/jcs.223719).

**KEY WORDS:** Integrins, Liposomes, Protein–protein interactions, Protein–lipid interactions

## INTRODUCTION

Lipids provide an essential platform for protein interactions and biochemical reactions at biological membranes. Many techniques are available to assess protein–lipid binding and phosphoinositide (PI) specificity (Zhao and Lappalainen, 2012). Many of these assays and in particular those based on liposome generation – currently considered more representative of the *in cellulo* situation – need specialised equipment or employ complex protocols (e.g. surface

plasmon resonance, isothermal titration calorimetry and lipid microarray) (Ananthanarayanan et al., 2003; Beseničar et al., 2006; Lemmon et al., 1995; Saliba et al., 2014; Wu et al., 2012) that restrict their usage to specialised laboratories. Furthermore, these approaches require high lipid/protein concentrations that prevent large and systematic analyses and/or remain merely qualitative. Recently, several microscopy-based methods have been developed (Ceccato et al., 2016; Saliba et al., 2014) that provide quantitative data on protein interactions with liposomes and have the potential for high-throughput analyses. Flow cytometry has also been employed to quantify binding of purified recombinant proteins to liposomes (Temmerman and Nickel, 2009). However, none of these methodologies have been designed to incorporate transmembrane proteins within the lipid bilayer.

It is estimated that transmembrane proteins constitute up to one third of the human proteome (Ahram et al., 2006; Almén et al., 2009) and are essential components of biological membranes, constituting ~50% of the membrane volume (Müller et al., 2008). Transmembrane proteins regulate a plethora of essential cellular events, ranging from signal transduction to the flux of ions and metabolites across the membrane in response to a changing microenvironment. Owing to their functions and accessibility, they represent more than 60% of drug targets (Arinaminpathy et al., 2009). In spite of their importance, versatile methodologies to explore protein–protein interactions of transmembrane proteins within an experimentally controlled lipid microenvironment remain underdeveloped.

Integrins, an essential family of heterodimeric transmembrane adhesion receptors, recruit and support the formation of cytoplasmic protein complexes, collectively known as the integrin adhesome, at the plasma membrane to generate the cell machinery responsible for cell adhesion and adhesion-induced signalling and migration (Winograd-Katz et al., 2014). Currently, molecular interactions between integrin and adhesome components are mainly studied by qualitative techniques such as pulldowns using synthetic peptides or soluble recombinant proteins mimicking the integrin cytoplasmic domains. Alternatively, endogenous integrins are immunoprecipitated in the presence of detergents. In all these approaches, an intact membrane is absent, even though several core adhesome proteins, such as talin, are known to bind acidic phospholipids. As a result, investigations into the joint requirement of integrin transmembrane domains (TMDs) and/or cytoplasmic tail (CT) domains and acidic phospholipids in mediating protein recruitment to integrin tails have been, thus far, largely neglected.

Here, we describe a simple, sensitive and quantitative technique called ‘protein–liposome interactions by flow cytometry’ (denoted ProLIF) to simultaneously detect and quantify protein–protein and protein–lipid interactions in reconstituted proteoliposomes. We reconstituted ‘artificial integrins’ into proteoliposomes and investigated talin binding, as it is the most studied protein interacting with both the integrin CT and the plasma membrane in

<sup>1</sup>Turku Centre for Biotechnology, University of Turku and Åbo Akademi University, 20520 Turku, Finland. <sup>2</sup>Laboratoire Physico Chimie Curie, Institut Curie, PSL Research University, CNRS UMR 168, 75005 Paris, France. <sup>3</sup>Sorbonne Universités, UPMC, 75005 Paris, France. <sup>4</sup>Institut Curie, PSL Research University, UMR 168, Centre de Recherche, 75248 Paris, France. <sup>5</sup>Biochemistry, Faculty of Science and Engineering, Åbo Akademi University, 20520 Turku, Finland. <sup>6</sup>School of Biosciences, University of Kent, Canterbury, Kent CT2 7NJ, UK. <sup>7</sup>Department of Biochemistry, University of Turku, 20520 Turku, Finland.

\*These authors contributed equally to this work

‡Author for correspondence (Johanna.ivaska@utu.fi)

 J.I., 0000-0002-6295-6556

a phosphatidylinositol phosphate (PIP)-dependent manner (Calderwood et al., 2013). We used this interaction to demonstrate the applicability of our method for probing integrin–cytoplasmic-protein interactions in the context of a lipid bilayer of defined composition. We optimised ProLIF towards a mammalian expression system to circumvent the requirement for protein purification, preserve post-translational modifications and to enable the presence of possible essential co-factors to provide a more realistic biological characterisation of protein–protein binding.

## RESULTS

### Generation of streptavidin-bead-coupled liposomes for FACS detection

We first tested ProLIF by analysing the coupling of bare liposomes, containing a small fraction of biotinylated lipids, to streptavidin-coated carrier beads, according to steps 1, 3 and 4 outlined in the workflow in Fig. 1A. Liposomes are produced by lipid solubilisation in Triton X-100 and subsequent detergent removal by gradual addition of Bio-Beads™ (Rigaud et al., 1995). Although bare liposomes can also be produced through extrusion, giving control over the size of the resulting small unilamellar vesicles (SUVs) (Temmerman and Nickel, 2009), this technique does not allow for incorporation of transmembrane proteins. In contrast, detergent removal by Bio-Beads™ is a robust method that has been used to reconstitute many functional transmembrane proteins (Geertsma et al., 2008; Kolena, 1989; Lacapère et al., 2001; Moriyama et al., 1984; Mouro-Chanteloup et al., 2010; Nesper et al., 2008; Neves et al., 2009; Richard et al., 1990; Smith and Morrissey, 2004; Young et al., 1997) resulting in unilamellar vesicles (Rigaud et al., 1995). Such vesicles are close to the detection limit of the scatter of laser light in FACS instruments (Temmerman and Nickel, 2009). In order to make these liposomes amenable to standard flow cytometry detection, we incorporated biotinylated lipids (2% of total lipid content) during liposome preparation to enable vesicle capture on Streptavidin–Sepharose (SA) beads that have an average diameter of 34 µm. The SA beads are easily detected in a flow cytometer with forward scatter (FSC) and side scatter (SSC) plots (Fig. S1A). Upon addition of biotinylated liposomes, a distinct population of small objects appears (Fig. S1B); however, this population was ‘gated out’ during the analysis. Importantly, addition of biotinylated liposomes did not appear to promote bead aggregation, as the forward scatter area (FSC-A) versus forward scatter width (FSC-W) plot demonstrated a single population. To confirm that liposomes were captured by the SA beads, we produced liposomes encapsulating Cy5 dye (Fig. 1B). A strong signal was detected by flow cytometry when the Cy5-encapsulated liposomes were captured on SA beads. Importantly, interactions between SA beads and Cy5-encapsulated biotinylated liposomes could be effectively outcompeted by the addition of soluble biotin (Fig. 1B), confirming specific biotin-mediated binding of liposomes to the carrier beads.

### Optimal detection of lipid interactions with proteins isolated from mammalian cell lysates

Protein purification can be time consuming and, depending on the protein production source, critical post-translational modifications regulating protein binding to cell membrane components may be lacking. To overcome this limitation, we tested the suitability of ProLIF to detect membrane interactions of phosphatidylinositol (PI)-binding proteins generated in human embryonic kidney cells (HEK293 cell line). Cells expressing EGFP-tagged PI-binding domains, known to interact with specific PIPs in membranes, were lysed in a detergent-free extraction buffer, and fractions enriched in

cytoplasmic proteins and devoid of transmembrane and membrane-associated molecules were isolated by ultracentrifugation (Fig. S1C). To overcome experimental variability due to changes in protein expression levels and to allow comparison between different experimental conditions, the fluorescence intensity of the cytoplasmic fractions were measured in relation to an external fluorescein standard and equalised before the binding assay.

Detergent-free cell lysates were subsequently incubated with liposomes followed by SA beads and then liposome-bound SA beads were analysed by flow cytometry, according to the steps indicated in Fig. 1A. All the cytometer settings (count rate, gates, voltages and trigger strategy) and the sample preparation conditions were kept constant for all samples. Beads were gated based on forward and side scattering, and the fluorescence intensity of the gated population was visualised using a histogram (fluorescence intensity versus particle count) (Fig. 1C,D).

SA beads have a detectable level of auto-fluorescence (Fig. 1C); thus, in each experiment a sample containing beads only was also included and the auto-fluorescence was subtracted from all samples. Thus, the specific fluorescence signal corresponding to EGFP-protein-bound liposomes was obtained.

To determine the conditions providing the best signal-to-noise ratio, decreasing amounts of the phospholipase C- $\delta$ 1 (PLC $\delta$ 1) pleckstrin homology (PH) domain (PLC-PH–EGFP), which binds preferentially to phosphatidylinositol (4,5)-bisphosphate [PI(4,5)P<sub>2</sub>] (Lemmon and Ferguson, 2000) were incubated with a constant amount of bare biotinylated liposomes or PI(4,5)P<sub>2</sub>-containing biotinylated liposomes, captured on SA-beads and analysed by flow cytometry. The resulting titration data indicated that a concentration close to 8 nM provided a good compromise between achieving an optimal signal:noise ratio and minimising the amount of biological material needed for the experiment (Fig. S1D, see below for the equation for calculating the protein concentration).

### Detecting specific protein–lipid interactions

Having established optimal experimental conditions to detect binding of fluorescently tagged proteins to liposomes, we next investigated whether ProLIF could be used to detect well-documented protein–lipid interactions in a reproducible manner. PH domains are broadly expressed in numerous cytoplasmic signalling proteins and are known to promote protein binding to specific lipids in the membrane. We first compared binding of EGFP alone to binding of the EGFP-tagged Bruton tyrosine kinase (BTK) PH domain (BTK-PH–EGFP) to various liposomes. Beads alone were used as a control for autofluorescence (as described above). In addition, bare liposomes (no PI) were compared to liposomes containing 2.5% PI(4,5)P<sub>2</sub> or PI(3,4,5)P<sub>3</sub>. As shown in Fig. 1D,E and Fig. S2A, EGFP alone demonstrated background level binding with the signal intensity remaining similar in all liposome conditions. In contrast, BTK-PH–EGFP bound efficiently to PI(3,4,5)P<sub>3</sub> liposomes, whereas binding to PI(4,5)P<sub>2</sub> was very low, in line with the previously reported PI specificity for this PH domain (Kojima et al., 1997; Rameh et al., 1997).

To explore the specificity of ProLIF further, we analysed binding of two additional biologically distinct lipid-binding domains to liposomes. The PLC $\delta$  1 PH domain binds to PI(4,5)P<sub>2</sub>, serving as a specific tether that guides the protein to the plasma membrane (Garcia et al., 1995). In contrast, the zinc-finger FYVE domain, found in proteins such as the early endosomal antigen 1 (EEA1), binds phosphatidylinositol 3-phosphate [PI(3)P], which is specifically enriched on endosomal membranes, and fluorescently tagged fusions of tandem FYVE-domains (2xFYVE) serve as faithful reporters of PI(3)P-enriched

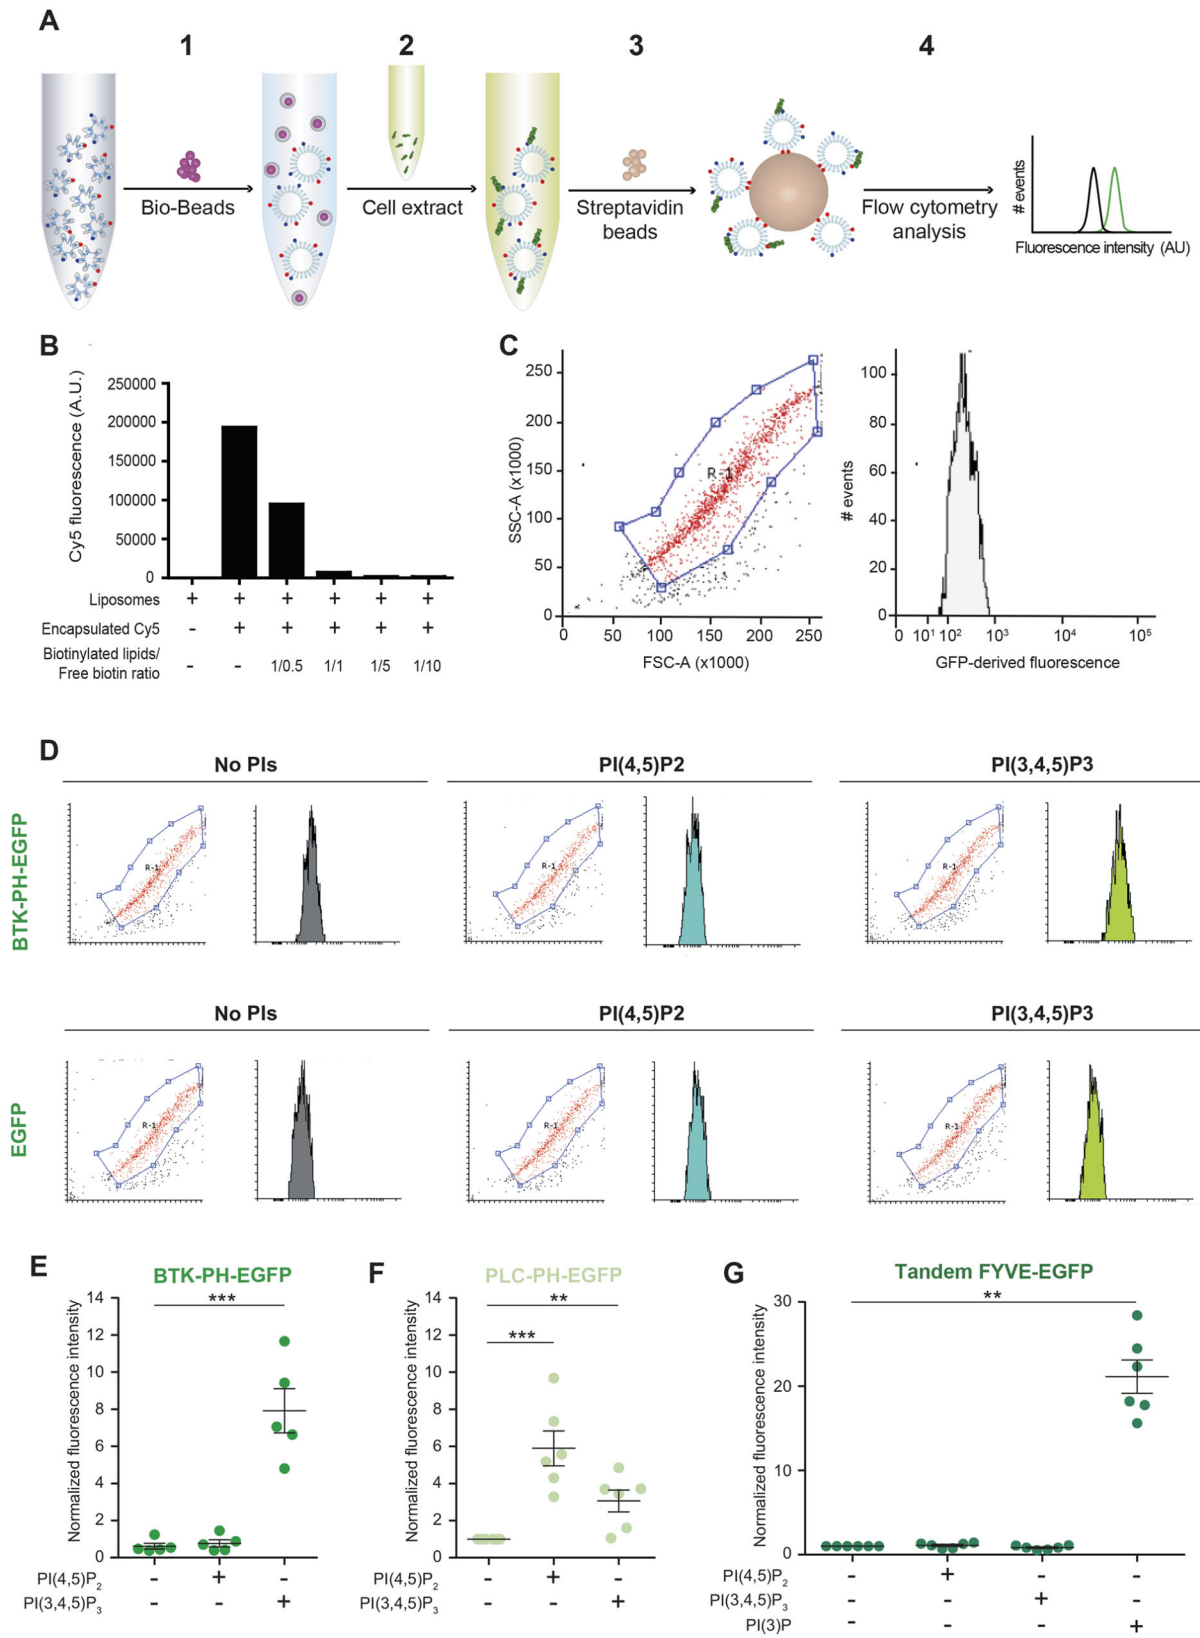

Fig. 1. See next page for legend.

membranes in cells (Gillooly et al., 2000; Stenmark et al., 2002). Importantly, the PI specificity of both of these lipid-binding domains was recapitulated with ProLIF. We detected PLC-PH-

EGFP binding specifically to liposomes containing 2.5% PI(4,5)P<sub>2</sub> (Fig. 1F; Fig. S2B) and strong binding of a tandem FYVE zinc finger domain to PI(3)P (Fig. 1G).

**Fig. 1. ProLIF is a flow cytometry-based assay for detection of specific protein-lipid interactions.** (A) Outline of ProLIF workflow. Step 1: Bio-Beads™ are added to lipids solubilised in Triton X-100 to remove the detergent and obtain liposomes. Step 2: liposomes are incubated with membrane-free cell extract containing the EGFP-tagged protein of interest. Step 3: Streptavidin–Sepharose (SA) beads are added in order to capture the liposomes via interaction with biotinylated lipids present in the liposome membrane. Step 4: SA beads are analysed by flow cytometry (FACS). Red dots and blue dots represent biotinylated lipids and PIs, respectively. Green fragments represent EGFP-tagged proteins from the cell lysate. (B) Biotinylated-lipid-containing liposomes were generated with and without encapsulated Cy5 dye, captured on SA beads in the presence or absence of increasing amounts of free biotin and analysed via FACS. The molar ratio between biotinylated lipids and soluble biotin added in each sample is indicated ( $n=1$ ). (C) Scatter plot and fluorescence histogram from SA beads alone incubated with cell lysate from EGFP-transfected cells and analysed by FACS. (D) Biotinylated-lipid-containing liposomes, with the indicated PI content, were incubated with cell lysates from EGFP alone- or BTK-PH–EGFP-transfected cells (equal EGFP concentrations) and then captured by SA beads and analysed by FACS. Shown are representative dot blots, and size gating in FACS, and histograms depicting EGFP fluorescence intensity (FL1) profiles (note that the axis labels are as in C). The red population in the scatter plot was gated for quantification. Data shown represent three individual experiments. (E) Binding of the BTK-PH–EGFP domain (from cell lysate as in D) to biotinylated-lipid-containing liposomes, with the indicated PI content, relative to control PI-free liposomes (data are normalised median fluorescence intensities shown as the mean  $\pm$  s.e.m.;  $n=5$  independent experiments). (F) Binding of EGFP-tagged PLC-PH domain (from cell lysate) to biotinylated-lipid-containing liposomes, with the indicated PI content, relative to control PI-free liposomes (data are normalised median fluorescence intensities shown as the mean  $\pm$  s.e.m.;  $n=5$  independent experiments). (G) Binding of tandem FYVE-EGFP domains (from cell lysate) to biotinylated-lipid-containing liposomes, with the indicated PI content, relative to PI-free liposomes (data are normalised median fluorescence intensities shown as the mean  $\pm$  s.e.m.;  $n=6$  independent experiments). \*\* $P<0.01$ , \*\*\* $P<0.001$

**Quantitative analyses of protein–lipid interactions**

To take the system a step further towards quantitative measurement of protein–lipid interactions, we first devised a way to calculate the concentrations of the EGFP-tagged proteins in the input mammalian cell lysates by using an external fluorescein standard. Based on the measured lysate fluorescence, a mathematical equation (Eqn 1) was derived (see Materials and Methods) to calculate EGFP-tagged protein concentration as follows:

$$C_{GFP} = \frac{F_{GFP} \epsilon_{Ext} C_{Ext} \phi_{Ext}}{\epsilon_{GFP} \phi_{GFP} F_{Ext}}, \tag{1}$$

where  $C_{Ext}$  and  $C_{GFP}$  are the concentrations of external standard (fluorescein) and the EGFP-tagged protein,  $\phi_{Ext}$  and  $\phi_{GFP}$  are the quantum yields of external standard and the EGFP-tagged protein and  $\epsilon_{Ext}$  and  $\epsilon_{GFP}$  are the extinction coefficients of external standard and the EGFP-tagged protein, respectively. To validate this equation, the fluorescence of a recombinant GFP protein of known concentration was measured at serial dilutions and a standard curve was generated. These experimentally derived fluorescence values were inputted into Eqn 1, together with variables and extinction coefficients from the fluorescein standard curve, and GFP concentrations were reverse calculated. Using this approach, a GFP standard curve closely matching the original experimental data was reproduced (Fig. 2A). Mathematically derived standard curves for EGFP-tagged proteins were generated using predicted extinction coefficients (see Materials and Methods) and quantum yields, and the fluorescence intensity of cell lysates expressing EGFP-tagged proteins of interest. Taking advantage of the calculated standard curve for the BTK-PH–EGFP, we incubated predetermined increasing concentrations of BTK-PH–EGFP with liposomes

containing 2.5% PI(3,4,5)P<sub>3</sub>. As expected, and as demonstrated earlier with a similar approach for a recombinant protein (Temmerman and Nickel, 2009), saturation of binding was achieved with increasing protein concentrations. Based on these data, we calculated a  $K_d$  of 174 nM  $\pm$  15.2 ( $R^2=0.95$ ) for BTK-PH–EGFP binding to PI(3,4,5)P<sub>3</sub> (Fig. 2B), which is within range of previously reported values (Kojima et al., 1997; Rameh et al., 1997). We performed similar experiments for tandem FYVE domain binding to liposomes containing 2.5% PI(3)P and obtained a  $K_d$  of 33.3 nM ( $R^2=0.81$ ) (Fig. 2C), compared to the reported  $K_d$  of 50 nM for a single FYVE domain (Gillooly et al., 2000; Gaullier et al., 2000). However, while ProLIF is extremely sensitive and can detect protein–lipid interactions at low protein concentrations, we found that unlike approaches that use recombinant proteins (Temmerman and Nickel, 2009), the amount of GFP-fused protein (e.g. PLC-PH–EGFP) extracted from mammalian cell lysates in our approach, is not always sufficient for determining  $K_d$  (data not shown). With this limitation in mind, ProLIF is applicable for specific qualitative and quantitative analysis of biologically distinct protein–lipid interactions of proteins isolated from mammalian cell lysates.

**Reconstituting integrin TMDs and CT domains on liposomes**

To apply ProLIF to the study of transmembrane protein interactions, we chose integrins as model proteins.

Integrin purification requires complex protocols that are not easy to scale up, precluding high-throughput application. For this reason, most of the studies involving purified full-length integrin are restricted to  $\alpha$ IIb $\beta$ 3, given the availability of platelets as a raw source. However, different integrin heterodimers can differ significantly in terms of physiological function and composition of their interactome (Rossier et al., 2012). In order to overcome this limitation, we designed two artificial genes encoding the TMD and CT of the extracellular receptors  $\alpha$ 5 and  $\beta$ 1 integrins and fused these to enhanced N-terminal Jun and Fos heterodimerisation modules (cJun[R]–FosW[E]) (Worrall and Mason, 2011), respectively (Fig. 3A) to promote  $\alpha$ 5 and  $\beta$ 1 integrin pairing (integrins exist as heterodimers on the plasma membrane) in the same orientation. Such modular organisation allows the study of different integrin heterodimers by simply modifying the TMD and cytoplasmic domains. Both Jun– $\alpha$ 5 and Fos– $\beta$ 1 integrin chimeras could be purified from membrane fractions when expressed in *Escherichia coli* by taking advantage of their purification tags, maltose-binding protein (MBP) and glutathione S-transferase (GST), respectively (Fig. S3A,B). When analysed by SDS-PAGE, both Jun– $\alpha$ 5 (molecular mass 52.8 kDa) and Fos– $\beta$ 1 (molecular mass 40.7 kDa) protein bands, recognised by specific antibodies raised against the  $\alpha$ 5 and  $\beta$ 1 integrin cytoplasmic domains, appeared at the correct size (Fig. 3B). Moreover, Jun– $\alpha$ 5 and Fos– $\beta$ 1 integrins were able to heterodimerise, as demonstrated by reciprocal co-immunoprecipitation (co-IP) assays with antibodies against either the  $\alpha$ 5 or  $\beta$ 1 integrin cytoplasmic domains (Fig. 3B,C).

Next, we reconstituted the Jun– $\alpha$ 5 and/or Fos– $\beta$ 1 integrin chimeras in liposomes using the same protocol as described above. The purified proteins, solubilised in mild detergent (see Materials and Methods), were added to the Triton X-100-solubilised lipids, and incorporated into the lipid bilayer during detergent removal via Bio-Beads™ (Fig. 3D). In this system, we lack the means to restrict the orientation of the fusion proteins on the liposomes resulting in ~50% of the reconstituted proteins having their cytoplasmic tails facing outwards. Given the strong affinity of the Jun–Fos dimer, in heterodimer-containing liposomes both  $\alpha$ - and  $\beta$ -integrin tails are also expected to face the same way resulting

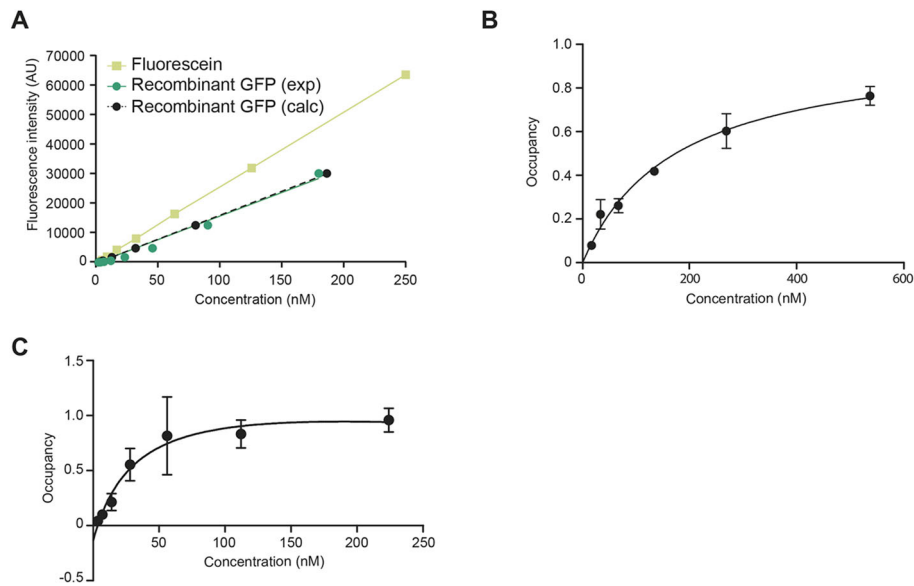

**Fig. 2. Quantitative measurements of protein-lipid interaction with ProLIF.** (A) Comparison of GFP and fluorescein standard curves. The fluorescence intensities of the indicated concentrations of fluorescein and recombinant GFP were determined experimentally (exp) and used to generate standard curves. The fluorescein standard curve was then used to calculate (calc) the theoretical GFP standard curve using Eqn (1). (B) Titration curve of BTK-PH-EGFP binding to PI(3,4,5)P<sub>3</sub>-containing liposomes (*n*=2). Cell lysates from BTK-PH-EGFP-transfected cells were diluted to contain the indicated concentrations of the EGFP-tagged protein [calculated as in Fig. 2A using Eqn (1)] and incubated with the liposomes. Protein-liposome interactions were subsequently analysed by FACS as outlined by the workflow in Fig. 1A. (C) Titration curve of tandem FYVE-EGFP binding to PI(3)P-containing liposomes (*n*=2). Cell lysates from tandem FYVE-EGFP-transfected cells were diluted to contain the indicated concentrations of the EGFP-tagged protein [calculated as in Fig. 2A using Eqn (1)] and incubated with the liposomes. Protein-liposome interactions were subsequently analysed by FACS as outlined in the workflow in Fig. 1A.

in 50% of dimers having the correct orientation. To verify whether the purified proteins were indeed being incorporated into liposomes, we performed a sucrose gradient flotation assay. In the presence of liposomes, the integrin chimeras, as single entities or as components of a heterodimer, were retrieved from the upper sucrose fractions indicating association between the integrin proteins and the lipid bilayer (Fig. 3E). In contrast, in the absence of lipids, protein aggregation was observed, and Fos-β1 was present in the bottom fraction (Fig. 3E). Importantly, when using the Bio-Bead reconstitution method, all protein is incorporated into liposomes, which makes a subsequent purification step unnecessary and helps to streamline the protocol.

**The integrin β1 CT and PIPs synergise to recruit the talin head to liposomes**

The integrin cytoplasmic domains have no enzymatic activity, and function by recruiting, and binding to, cytoplasmic adaptors and signalling proteins that link the receptor to the actin cytoskeleton (Bouvard et al., 2013). Talin is a classical integrin activator and one of the first proteins recruited to integrin heterodimers at the plasma membrane. The talin FERM domain binds directly to β-integrin subunits, an event that is linked to separation of the α- and β-integrin tails and the subsequent change to the activated conformation of the receptor and recruitment of other proteins. Talin also contains a PI-binding surface within its FERM domain (Elliott et al., 2010) and, as such, offers an excellent candidate for validating the ProLIF system. Using a concentration of EGFP-tagged talin FERM domain (3 nM) that was determined to provide a good signal-to-noise ratio (Fig. S3C), we observed significant talin binding to liposomes containing the Fos-β1 integrin protein (Fig. 4A,B). As expected, talin did not bind to liposomes containing the Jun-α5 integrin subunit alone. Importantly, none of the conditions caused bead aggregation, as only a single main population was apparent in the

FSC-A versus FSC-W plots (Fig. S4A). Interestingly, talin binding to the Fos-β1 integrin protein was completely lost when the β1 integrin tail was embedded as part of the integrin heterodimer [(Jun-α5)-(Fos-β1)] within the liposome (Fig. 4B), suggesting that this construct may represent a ‘tails-together’ conformation of the integrin cytoplasmic face. This inhibitory effect was not due to membrane overcrowding, as reducing the transmembrane protein: lipid molar ratio by 50% (1:7000 instead of 1:3500) preserved the binding pattern (Fig. S4B). The interaction of the talin FERM domain with liposomes was modestly, but significantly, increased when PI(4,5)P<sub>2</sub> was included in the liposomes, in line with the affinity of the talin FERM domain for plasma membrane acidic phospholipids (Calderwood et al., 2013). Notably, the presence of PI(4,5)P<sub>2</sub> and Fos-β1 integrin in the same liposomes substantially enhanced talin binding far beyond levels observed for each individual component, suggesting an additive and possibly synergistic binding effect, revealed by the ability of the ProLIF system to incorporate membrane-embedded integrins and membrane lipids in the same binding assay. In PI(4,5)P<sub>2</sub>-containing vesicles, talin FERM binding was reduced when both Fos-β1 and Jun-α5 were present (Fig. 4B). Binding of talin FERM domain to Jun-α5 and PI(4,5)P<sub>2</sub> was similar to that in conditions containing PI(4,5)P<sub>2</sub> alone, suggesting that the talin FERM-PI(4,5)P<sub>2</sub> interaction is preserved despite loss of interaction with the β1 integrin receptor (Fig. 4B). Incubation with an excess of soluble biotin, which outcompetes liposome binding to the beads, resulted in the complete loss of the fluorescence signal (Fig. S4C), serving as an important control and confirming that the signal is only due to binding events occurring at the membrane rather than unspecific binding to the beads.

With ProLIF, we could also observe talin binding to PI(3,4,5)P<sub>3</sub> alone, and detected a substantial enhancement in talin binding to PI(3,4,5)P<sub>3</sub>- and Fos-β1-containing liposomes that was equivalent

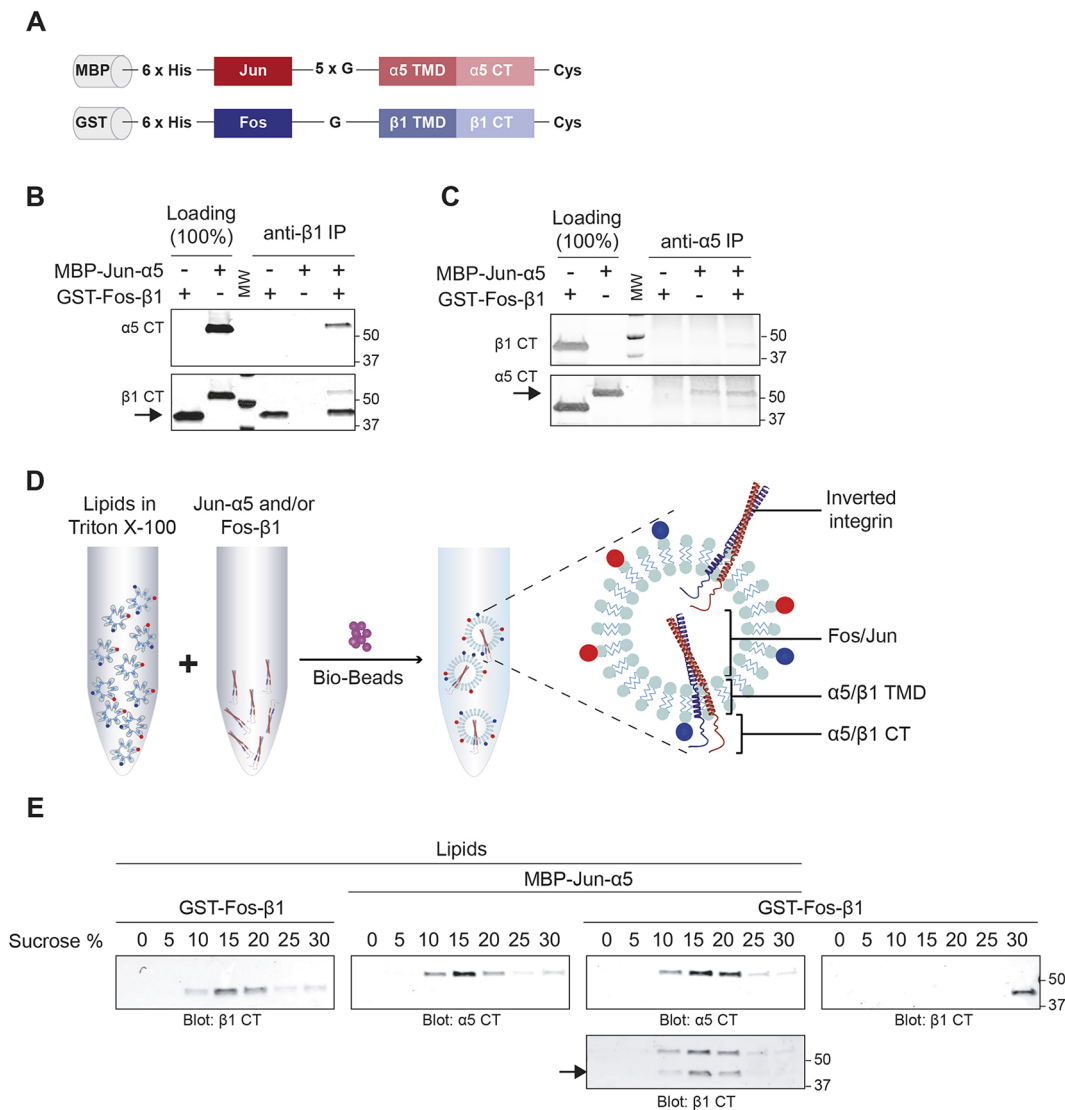

**Fig. 3. Reconstituting integrin TMD and CT domains on liposomes.** (A) Domain architecture of MBP–Jun–α5 and GST–Fos–β1 constructs. G, glycine; TMD, transmembrane domain; CT, cytoplasmic tail domain; Cys, cysteine. (B) The indicated purified recombinant proteins alone or in combination were subjected to immunoprecipitation (IP) with an anti-β1 integrin antibody directed against the β1 cytoplasmic domain: MBP–Jun–α5 co-immunoprecipitated with GST–Fos–β1. Filters were probed with rabbit anti-α5 integrin cytoplasmic domain antibody and then reprobed with rabbit anti-β1 integrin cytoplasmic domain antibody. The arrow indicates the β1 integrin chimera band. A representative blot is shown (*n*=2 independent experiments). (C) The indicated purified recombinant proteins alone or in combination were subjected to immunoprecipitation with an anti-α5 integrin antibody directed against the α5 cytoplasmic domain: GST–Fos–β1 co-immunoprecipitated with MBP–Jun–α5. Filters were probed with rabbit anti-β1 integrin cytoplasmic domain antibody and then reprobed with rabbit anti-α5 integrin cytoplasmic domain antibody. The arrow indicates the α5 integrin chimera band. A representative blot is shown (*n*=2 independent experiments). (D) Schematic of MBP–Jun–α5 and GST–Fos–β1 integrin incorporation in proteoliposomes. (E) Gradient flotation assay showing reconstitution of GST–Fos–β1, MBP–Jun–α5 and the β1–α5 heterodimer in liposomes. Purified recombinant GST–Fos–β1 and MBP–Jun–α5 were incorporated either alone or in combination into liposomes as depicted in the diagram. The resulting proteoliposomes were analysed using a flotation assay in sucrose gradient. Liposome-incorporated proteins float up the gradient (10–20% sucrose fractions), whereas in the absence of liposomes the protein alone remains in the bottom (30% sucrose) fraction (GST–Fos–β1 in the most right-hand panel). The protein:lipid molar ratio is 1:3500 for both MBP–Jun–α5 and GST–Fos–β1. The arrow indicates the β1 integrin chimera in the reprob filter.

to that for PI(4,5)P<sub>2</sub>- and Fos-β1-containing liposomes (Fig. 4C,D). The ability of talin to tether to the β1 integrin CT in conjunction with both PI(4,5)P<sub>2</sub> and PI(3,4,5)P<sub>3</sub> has not been carefully studied before and may be linked to interesting biological functions warranting further investigation in the future.

Next, we set out to determine the *K<sub>d</sub>* for talin FERM binding to integrins in our system but were unable to isolate enough of the protein from mammalian cell lysates to perform the experiment. However, we took advantage of ProLIF as a versatile system that can be tailored towards recombinant proteins, to monitor binding of a

recombinant His-tagged talin FERM protein to β1-integrin-containing liposomes *in vitro*. Using this approach, we were able to determine a *K<sub>d</sub>* of 0.77 μM (*R*<sup>2</sup>=0.65) for talin FERM (Fig. 4E). β1 integrin peptides binding to talin head fragments in solution have been reported by multiple groups to be significantly weaker (i.e. *K<sub>d</sub>* 490 μM for β1A binding to talin1 F3; Anthis et al., 2009) demonstrating the central role of the membrane in mediating these interactions, and illustrating why studying these interactions in their native environment, as is possible using the ProLIF assay, is imperative.

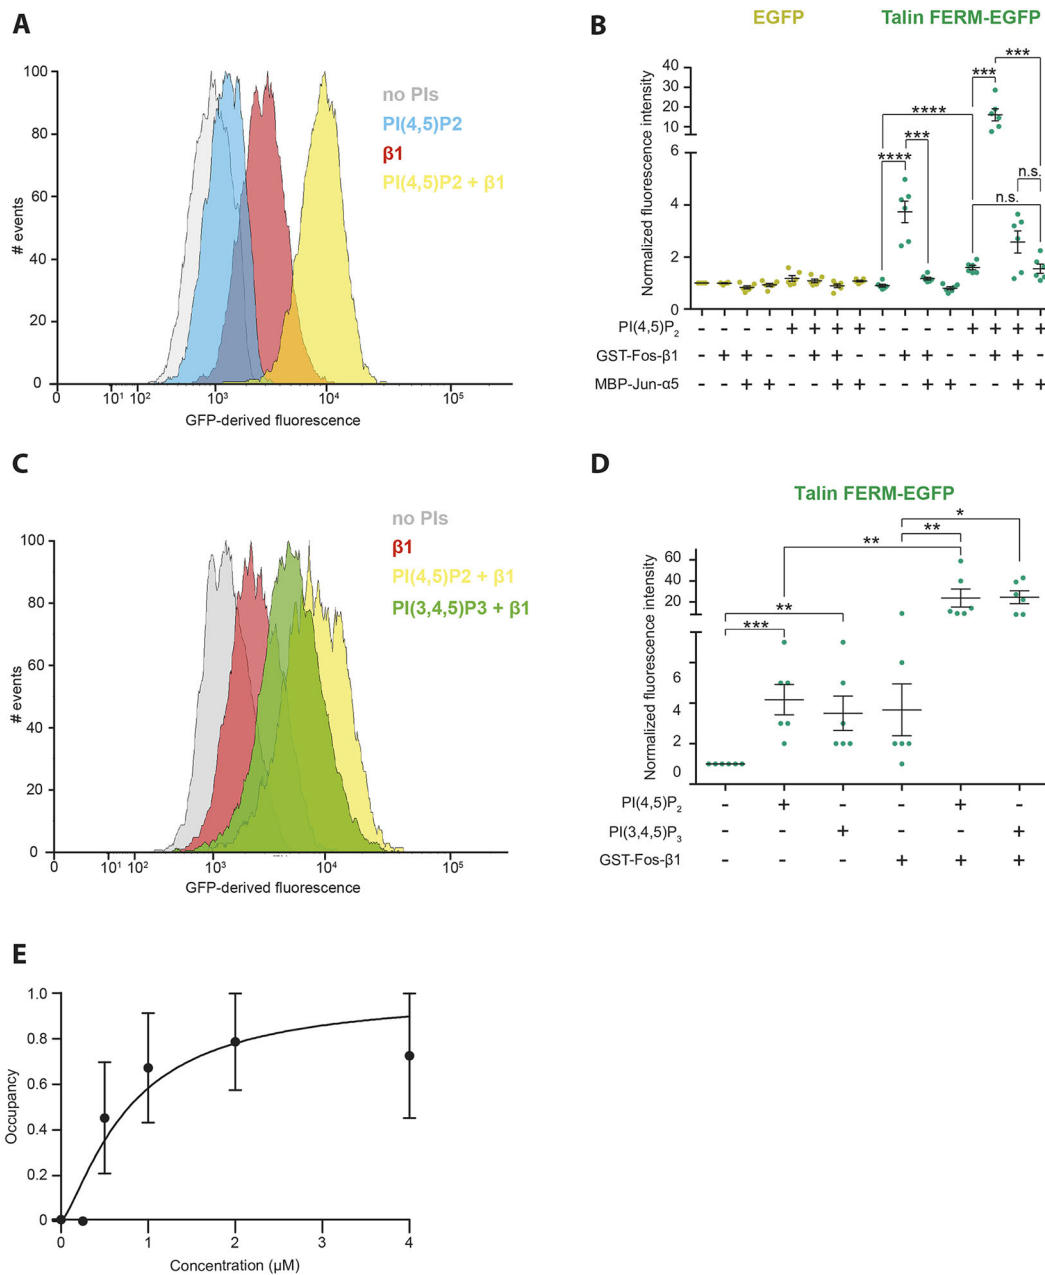

**Fig. 4. PIP<sub>2</sub> and PIP<sub>3</sub> synergise with the integrin β<sub>1</sub> tail to support talin head domain recruitment.** (A) Example fluorescence intensity histograms of talin-FERM-EGFP (from lysates of transfected cells) binding to biotinylated-lipid-containing proteoliposomes, with PI(4,5)P<sub>2</sub> and GST-Fos-β<sub>1</sub> as indicated. Grey, lipids control (no PI); blue, PI(4,5)P<sub>2</sub>; red, GST-Fos-β<sub>1</sub>; yellow, PI(4,5)P<sub>2</sub>+GST-Fos-β<sub>1</sub>. (B) Quantification of binding of talin FERM-EGFP and EGFP control cell lysates at equimolar concentration to proteoliposomes with the indicated PI and integrin content (data are normalised median fluorescence intensities shown as the mean ± s.e.m.; n=6 independent experiments). (C) Example fluorescence intensity histograms of talin FERM-EGFP (from lysates of transfected cells) binding to biotinylated-lipid-containing proteoliposomes with PI(4,5)P<sub>2</sub>, PI(3,4,5)P<sub>3</sub> and GST-Fos-β<sub>1</sub> integrin as indicated. Grey, lipids control (no PI); red, GST-Fos-β<sub>1</sub>; yellow, PI(4,5)P<sub>2</sub>+GST-Fos-β<sub>1</sub>; green, PI(3,4,5)P<sub>3</sub>+GST-Fos-β<sub>1</sub>. (D) Quantification of binding of talin FERM-EGFP to proteoliposomes with the indicated PI and integrin content (data are normalised median fluorescence intensities shown as the mean ± s.e.m.; n=6 independent experiments). (E) Titration curve of recombinant His-tagged talin-FERM (labelled with Alexa-Fluor-488–Maleimide) binding to GST-Fos-β<sub>1</sub>-integrin-containing proteoliposomes (n=2). Recombinant protein was diluted to contain the indicated concentrations and incubated with the proteoliposomes and interactions were subsequently analysed by FACS. \*P<0.05, \*\*P<0.01, \*\*\*P<0.001, \*\*\*\*P<0.0001; n.s. not significant.

**DISCUSSION**

We demonstrate here that ProLIF is a sensitive, versatile and quantitative system to study protein interactions at the cytoplasmic interface of transmembrane proteins, taking into account the individual or synergistic contribution of protein–protein and protein–membrane lipid interactions.

The benefits and sensitivity of ProLIF are particularly exemplified with the integrin chimeras. Many individual protein–protein interactions in the integrin adhesome are characteristically of low affinity and much of the biology is based on synergistic binding events, clustering and multivalent interactions. Thus, studying the integrin cytoplasmic interactions with biochemical assays such as

pull-downs with integrin tail peptides in detergent can be challenging and does not represent the situation in cells. This is highlighted by the ProLIF data, which demonstrates that the talin- $\beta 1$  integrin interaction is strongly enhanced by the presence of specific PI species. Thus, it is important to investigate how protein-protein interactions are regulated in the context of changing membrane lipid composition, an aspect that is potentially underestimated in the current integrin cell adhesion literature. Indeed, a number of lipid-binding domains have been identified and characterised (Lemmon, 2008) and the domain architecture of many proteins, including trafficking proteins, kinases and scaffold proteins, combines lipid- and protein-binding modules (Cullen, 2008; Pearce et al., 2010). Thus, the synergistic effect observed for talin is likely to be a widespread phenomenon that could be addressed using ProLIF.

The mammalian expression system, optimised for ProLIF, also adds novelty over other methods available for monitoring protein-lipid binding as it supports post-translational modifications of the soluble protein and the formation of protein complexes within cells. These events could be manipulated by biological reagents to gain further insight into mechanisms regulating protein binding to membrane components.

We believe that the simple strategy for lipid and protein reconstitution in liposomes and the use of a flow cytometer makes ProLIF a powerful, yet amenable, tool for the quantitative detection of binding events on membranes, which can be applied to other transmembrane proteins. Moreover, ProLIF can be further developed into multiplexed assays by taking advantage of the palette of fluorescent tags available.

## MATERIALS AND METHODS

### Plasmids and constructs

The Jun- $\alpha 5$  artificial gene (human  $\alpha 5$  integrin, amino acids 989–1049) was synthesised by DNA2.0 (manufacturer) in pD441-HMBP. The Fos- $\beta 1$  (human  $\beta 1$  integrin, amino acids 725 to 798) artificial gene was synthesised by DNA2.0 and cloned in the pGEX-4T vector using the EcoRI and BamHI cloning sites. Glycine linkers were inserted between the Jun/Fos dimerisation motifs and the integrin transmembrane domains. Insertion of the 6 $\times$ His tag was performed with the QuikChange II site-directed mutagenesis kit (Agilent Technologies). All constructs were fully sequenced prior to use.

The sequence of the Fos- $\beta 1$  integrin chimera is as follows: 5'-GGATCCATCATCATCATCATGCGCGCGCGAGCCTGGATGAAC-TGGAAGCGAAATTGAACAGCTGGAAGAAGAAACTATGCGC-TGGAAAAAGAAATTGAAGATCTGGAAAAAGAACTGGAAAAACT-GGGCGCGCCGGCACCGGCCGATATTATCCGATTGTGGCGG-GCGTGGTGGCGGGCATTGTGCTGATTGGCCTGGCGCTGCTGCTG-ATTTGGAAACTGCTGATGATTATTCATGATCGTCTGTAATTTGCG-AAATTTGAAAAAGAAAAATGAACGCGAAATGGGATACCGGCG-AAAACCCGATTATAAAGCGCGGTGACCACCGTGGTGAACCCG-AAATATGAAGCAATGCTAATAAGAATTC-3'.

The sequence of the Jun- $\alpha 5$  integrin chimera is as follows: 5'-ATGGG-ATCCATCATCATCATCATGCGCGCGCGAGCATTGCGC-GTCTGCGTGAACGTGTGAAAACCTGCGTGCCTGTAACATGAACTGACTGCGTAGCCGTGCGAACATGCTGCGTGAACGTGGCGCAG-CTGGGCGCGCCGGCGCGCGCGCCACCAAGCGGAAGGC-AGCTATGGCGTGCCTGCTGTTGATTATTCTGGCGATTCTGTT-TGGCCTGCTGCTGCTGGCCTGCTGATTTATATTCTGTATAAAC-TGGGCTTTTTAAACGCAGCCTGCCGATGGCACCGCGATGGA-AAAAGCAAGCTGAAACCGCGCGACAGCGATGCGTGCTA-TAAGAATTC-3'.

Plasmids encoding BTK-PH-EGFP and PLC( $\delta 1$ )-PH-EGFP were kind gifts from Matthias Wymann (University of Basel, Switzerland). The EGFP-tagged tandem FYVE was a gift from Harald Stenmark (Oslo University Hospital, Norway) and has been previously described (Gillooly

et al., 2000). The talin FERM-EGFP (mouse talin 1 residues 1–433) construct was made by the PROTEX facility at the University of Leicester, UK. The recombinant His-tagged talin FERM (mouse talin 1 residues 1–405) has been described previously (Elliott et al., 2010).

### Cells, antibodies, lipids and reagents

HEK 293 cells (ATCC) were grown in Dulbecco's modified Eagle's medium (DMEM) with high glucose (4500 mg/ml) (Sigma-Aldrich) supplemented with 1% L-glutamine (Gibco), 10% fetal bovine serum (FBS; Sigma-Aldrich) and 1% penicillin-streptomycin (Sigma-Aldrich). HEK 293 cells were tested for mycoplasma contamination prior to use. The following antibodies were used: anti-integrin  $\beta 1$  (Abcam; Ab183666) and anti-integrin  $\alpha 5$  (Merck Millipore; AB1949) for immunoblotting (1:1000 dilution) and immunoprecipitation (1  $\mu$ g of antibody per sample). The following lipids were used: L- $\alpha$ -phosphatidylcholine (EggPC, 840051P); L- $\alpha$ -phosphatidic acid (EggPA, 840101P); 5-cholestene-3 $\alpha$ , 20 $\alpha$ -diol (20 $\alpha$ -hydroxycholesterol, 700156); L- $\alpha$ -phosphatidylinositol-4,5-bisphosphate (Brain PI(4,5)P<sub>2</sub>, 840046X); 1-stearoyl-2-arachidonoyl-*sn*-glycero-3-phospho-(1'-myo-inositol-3',4',5'-trisphosphate) [18:0-20:4 PI(3,4,5)P<sub>3</sub>, 850166P]; 1,2-dioleoyl-*sn*-glycero-3-phospho-(1'-myo-inositol-3'-phosphate) [18:1 PI(3)P, 850150P]; and 1-oleoyl-2-[12-biotinyl(aminododecanoyl)]-*sn*-glycero-3-phosphoethanolamine [18:1-12:0 Biotin PE, 860562P]. All lipids were purchased from Avanti Polar Lipids. Recombinant GFP protein was purchased from Thermo Fisher Scientific. Streptavidin Sepharose high performance beads (17-5113-01) were purchased from GE Healthcare.

### Membrane protein purification

The Rosetta strain (Merck) of competent *E. coli* cells was used for Jun- $\alpha 5$  and Fos- $\beta 1$  protein expression. Briefly, bacteria were transformed with the respective DNA according to manufacturer's instructions and positive clones were selected on agar plates containing 100  $\mu$ g/ml ampicillin and 33  $\mu$ g/ml chloramphenicol (both from Sigma). Transformed bacteria were then grown in LB broth containing ampicillin and chloramphenicol until the optical density at 600 nm (OD<sub>600</sub>)=0.6 at which point protein expression was induced by addition of 0.5 mM IPTG (Sigma) for 5 h at 25°C. Bacteria were pelleted (4000 g for 20 min), transferred to a falcon tube and flash-frozen in liquid N<sub>2</sub>. Cells were resuspended in 50 mM Tris-HCl pH 7.5, 150 mM NaCl, 600  $\mu$ M TCEP [Tris(2-carboxyethyl)phosphine hydrochloride, Sigma], 500  $\mu$ M PMSF (Sigma), 2 mM AEBSF [4-(2-Aminoethyl)benzenesulfonyl fluoride hydrochloride, Sigma], 0.1 mg/ml DNase (Roche), protease inhibitor (Roche), 1 mM mercaptoethanol (Sigma), 5 mM MgCl<sub>2</sub> and lysozyme (Sigma) and disrupted using a cell disruptor. Cell lysates were clarified at 27,000 g using a JA 25/50 rotor for 20 min at +4°C and resulting supernatants further centrifuged at 278,000 g in a Ti50.2 rotor for 1 h to pellet membranes. The membrane pellet was resuspended in 50 mM Tris-HCl pH 7.5, 150 mM NaCl, 600  $\mu$ M TCEP, 500  $\mu$ M PMSF, 1 mM AEBSF and homogenised in a Teflon homogeniser and after addition of sucrose (300 mM) samples were flash-frozen in liquid nitrogen. Membrane suspensions were thawed, incubated with n-dodecyl- $\beta$ -D-maltoside (DDM) (Anatrace) at a 5:1 (w:w) ratio for 2 h at +4°C with agitation and centrifuged at 244,000 g in a Ti50.2 rotor for 50 min at +4°C. Supernatants were incubated with Ni<sup>2+</sup> sepharose beads (GE Healthcare) for 2 h at +4°C. Beads were washed with 50 mM Tris-HCl pH 7.5, 150 mM NaCl, 600  $\mu$ M TCEP, 1 mM AEBSF +0.5% DDM, followed by a second wash with 50 mM Tris-HCl pH 7.5, 150 mM NaCl, 600  $\mu$ M TCEP, 1 mM AEBSF and either 0.05% DDM (for Fos- $\beta 1$ ) or 0.1% DDM (for Jun- $\alpha 5$ ). Proteins were eluted with 50 mM Tris-HCl pH 7.5, 150 mM NaCl, 1 mM AEBSF, 0.05% DDM plus 250 mM imidazole. Eluted proteins were incubated with either glutathione-Sepharose beads (purification of GST-tagged Fos- $\beta 1$ ; GE Healthcare) or dextrin-Sepharose beads (purification of MBP-tagged Jun- $\alpha 5$ ; GE Healthcare) for 60 min at +4°C. Beads were washed with 50 mM Tris-HCl pH 7.5, 150 mM NaCl, 600  $\mu$ M TCEP, 1 mM AEBSF and either 0.05% DDM (for Fos- $\beta 1$ ) or 0.1% DDM (for Jun- $\alpha 5$ ). Proteins were eluted with 50 mM Tris-HCl pH 7.5, 150 mM NaCl, 1 mM AEBSF, 0.05% DDM and either 30 mM glutathione (for Fos- $\beta 1$ ) or 20 mM maltose (for Jun- $\alpha 5$ ) and flash-frozen in 10% glycerol in liquid nitrogen and stored at -80°C. ~1 mg of protein per litre of bacterial culture was purified using this technique.



### Bio-Beads™ preparation and dosing

Bio-Beads™ (Bio-Rad) were sifted to exclude small beads and subsequently washed three times with methanol and five times with dH<sub>2</sub>O. Beads were left to sediment and during liposome preparation (see below) added in volumes of 15 μl (reproducibly corresponds to 3 mg of beads), collected from the bottom of the tube using a cut tip.

### Liposome and proteoliposome reconstitution

The control lipid mix used throughout the study, unless otherwise indicated, was composed of 73% (w/w) Egg-PC, 10% (w/w) Egg-PA, 15% (w/w) cholesterol and 2% (w/w) biotinylated lipids. Where indicated, PIs were included at the expense of Egg-PA to preserve the percentage of negatively charged lipids at 10%.

In the case of BTK-PH-EGFP *K<sub>d</sub>* fitting and the BTK-PH-EGFP example histograms in Fig. 1D, the liposome composition used was 80.5% (w/w) POPC (synthetic substitute for Egg-PC; 850457P, Avanti Polar Lipids) lipids, 15% (w/w) cholesterol and 2% (w/w) biotinylated lipids plus 2.5% (w/w) PI(3,4,5)P<sub>3</sub>.

The lipids solubilised in organic solvent were mixed and dried under a nitrogen stream, vacuum-dried for at least 20 min, resuspended in dH<sub>2</sub>O at 10 mg/ml and vortexed. The resulting liposomes were aliquoted in single-use aliquots and stored at -20°C. For each liposome/proteoliposome reconstitution, 400 μg of total lipids were solubilised in Triton X-100 (Triton X-100:lipid ratio of 2.5, w/w) in a total volume of 400 μl of reconstitution buffer (50 mM Tris-HCl pH 7.0, 150 mM NaCl and 600 μM TCEP) at room temperature with constant stirring until the solution became clear indicating total lipid solubilisation. Solubilised lipids were cooled to +4°C and 1 mM EDTA, 5 mM AEBSF, GST-Fos-β1 and/or MBP-Jun-α5 were added to the solution and stirred at +4°C for 15 min. Prewashed Bio-Beads™ (total 48 mg) were gradually added to the solution at +4°C while constantly stirring; 3 mg of Bio-Beads were added and the solution was incubated for 90 min, followed by 3 mg of Bio-Beads and a 90 min incubation, followed by 12 mg of Bio-Beads and an overnight incubation. Finally, this was followed by 30 mg of Bio-Beads and 120 min of incubation.

### Cell transfection

HEK 293 cells were seeded at a density of 25–35% confluence and transfected the next day at 50–70% confluence according to the following protocol for a 10 cm dish. The plasmid of interest (12 μg) was mixed with 250 μl of Opti-MEM (Gibco) for 5 min at room temperature. A premix of polyethylenimine, Linear, MW 25000 (PEI 25K) transfection reagent (stock in MQ H<sub>2</sub>O; 1 mg/ml) (Polysciences Inc) (30 μl incubated with 250 μl of Opti-MEM for 5 min at room temperature) was then added and incubated for a further 30 min at room temperature. The transfection solution was placed on top of the 5 ml of culture medium present in the cell culture dish. Cells were harvested after overnight incubation.

### Isolation of detergent-free cell lysate

Cells were washed twice with PBS and scraped in 400 μl of detergent-free lysis buffer (10 mM Tris-HCl pH 7.5, 250 mM sucrose, 1 mM EDTA, 1 mM MgOAc, 20 μM ATP plus complete protease and PhosSTOP phosphatase inhibitor tablets, Roche) at +4°C. Cell extracts were passed through a syringe needle (0.5 mm) five times, sonicated at +4°C for 5 min and ultracentrifuged at 100,000 *g* for 1 h at +4°C. The resulting supernatant, depleted of membrane and transmembrane fractions, was used for the experiment.

### Co-immunoprecipitation

An equimolar mixture of Fos-β1 and Jun-α5 were subjected to immunoprecipitation using 1 μg of the indicated antibodies at +4°C for 2 h in 50 mM Tris-HCl pH 7.5, 150 mM NaCl, 600 μM TCEP plus 0.1% DDM. Immunoprecipitated complexes were isolated on protein-G beads (GE Healthcare) for 2 h at +4°C. Beads were then washed once with the same buffer and suspended into loading buffer. Samples were separated by SDS-PAGE and analysed by western blotting.

### Flotation assay

Equimolar amounts of Fos-β1 and Jun-α5 were reconstituted in liposomes, mixed in a 1:1 ratio with a 60% sucrose solution and added to the bottom of

an ultracentrifuge tube. Decreasing concentrations of sucrose were progressively layered on top to form a gradient and the sample was centrifuged overnight at 20,000 *g* at +4°C. Fractions were retrieved and analysed by SDS-PAGE.

### Calculation of EGFP concentration within cell lysates

The fluorescence intensity of serial dilutions of fluorescein (1–256 nM in dH<sub>2</sub>O) was measured using the BioTek Synergy H1 hybrid reader to obtain a standard curve. The fluorescence intensity of cell lysates was measured in relation to this standard curve and EGFP-tagged protein concentration calculated using Eqn 1. The fluorescein quantum yield in dH<sub>2</sub>O ( $\phi_{Ext}$ ) and extinction coefficient ( $\epsilon_{Ext}$ ) are 0.76 and 76,900 M<sup>-1</sup> cm<sup>-1</sup>, respectively (Song et al., 2000; Zhang et al., 2014); GFP quantum yield ( $\phi_{GFP}$ ) and extinction coefficient ( $\epsilon_{GFP}$ ) are 0.53 and 70,000 M<sup>-1</sup> cm<sup>-1</sup> (for dimeric GFP) (Thermo Scientific), respectively. For EGFP-tagged proteins, extinction coefficients were calculated using the ExPASy ProtParam tool at <http://web.expasy.org/protparam/> to obtain the predicted coefficient for each EGFP-tagged construct.

The fluorescence intensity or number of excited molecules during passage of light through a sample can be derived from the Beer–Lambert law:

$$I = I_0 e^{-\ln(10)\epsilon_\lambda c l},$$

where *I* corresponds to the transmitted light through the sample, *I*<sub>0</sub> is the incident radiation,  $\epsilon_\lambda$  is the extinction coefficient at the excited wavelength  $\lambda$ , *c* is the concentration, and *l* is the light path length. For low absorbance values, this can be expanded to:

$$I = I_0 [1 - \ln(10)\epsilon_\lambda c l].$$

The emission intensity (*F*<sub>λ</sub>) for one type of molecule at a given wavelength is a function of the quantum yield ( $\phi_F$ ), the fraction of emission that occurs at that wavelength (*f*<sub>λ</sub>), and the fraction of the radiation that is actually collected by the detector (*j*):

$$F_\lambda = \ln(10)\epsilon_\lambda c l I_0 \phi_F f_\lambda j.$$

Solving this equation for the concentration of our EGFP-labelled molecule, we obtain the following expression (sub-indices indicate the sample):

$$c_{GFP} = \frac{F_{GFP}}{\ln(10)\epsilon_{GFP} l I_0 \phi_{GFP} f_\lambda j}.$$

Now, using the calibration curve obtained with external standard we can obtain the incident radiation (*I*<sub>0</sub>):

$$I_0 = \frac{F_{Ext}}{\ln(10)\epsilon_{Ext} l c_{Ext} \phi_{Ext} f_\lambda j},$$

that when combined with the previous equation results in Eqn (1) (see above) where the ratio *c*<sub>Ext</sub>/*F*<sub>Ext</sub> is the inverse of the slope in the linear fit of *F*<sub>Ext</sub> as a function of *c*<sub>Ext</sub> in the calibration curve.

### Flow cytometry-based binding assay

The fluorescence of cell lysate (excitation/emission, 485/528) was measured in relation to a fluorescein titration curve in dH<sub>2</sub>O using the BioTek Synergy H1 hybrid reader. Eqn (1) was applied to calculate the EGFP-tagged protein concentration. The concentration of cell lysate was adjusted by dilution in detergent-free reconstitution buffer (50 mM Tris-HCl pH 7.0, 150 mM NaCl and 600 μM TCEP). 150 μl cell lysate was transferred to an Eppendorf tube and incubated with 90 μl of reconstitution buffer (50 mM Tris-HCl pH 7.0, 150 mM NaCl and 600 μM TCEP) and 60 μl of the liposome/proteoliposome mix for 4 h with constant stirring at +4°C.

Samples were then incubated with SA beads (2 μl) for 30 min at +4°C. Samples were kept on ice and loaded one at a time on a BD LSRFortessa™ cell analyzer (BD Bioscience).

### Flow cytometry settings, data acquisition and analysis

Data acquisition was performed with a fluorescence-activated cell sorter (FACS) LSRFortessa™ flow cytometer (BD Biosciences) and the dedicated BD FACSDiva™ software.

To excite and detect liposome-bound EGFP fluorescence emission (excitation/emission, 488/509) a 488 nm laser line together with a filter set of a 505 nm long-pass filter and a 530/30 nm filter was used. To detect Cy5 (excitation/emission, 496, 565/670), a 532 nm laser line together with a filter set of a 635 nm long-pass filter and a 670/30 nm filter was used.

Before any measurements were made, voltages in the photomultiplier tube (PMT) were adjusted accordingly to make streptavidin bead population fit into the linear range of the instrument as visually evaluated by scatter plot (FSC-A versus SSC-A, Fig. 1C).

Subsequently, PMT was adjusted to accommodate both background fluorescence from the beads and sample fluorescence into the detection window. The typical count rate was below 200 events/second.

Raw data was analysed by using a non-commercial Flowing Software v. 2.5 (Mr Perttu Terho; Turku Centre for Biotechnology, Finland; www.flowingsoftware.com), where the appropriate population of beads was gated and analysed for their respective fluorescence intensities. Median fluorescence values were used for the subsequent data analysis as these are less sensitive for outliers than mean values.

### $K_d$ fitting for EGFP-tagged proteins isolated from cell lysates

To obtain minimal background, synthetic POPC was used for  $K_d$  measurement instead of EggPC. Liposomes containing synthetic POPC lipids (80.5% w/w), cholesterol (15% w/w), biotinylated lipid (2% w/w) and PI(3,4,5)P<sub>3</sub> (2.5% w/w) (for BTK-PH-EGFP) or PI(3)P (2.5% w/w) (for tandem FYVE-EGFP) were prepared as before. In control liposomes, used to measure background fluorescence resulting from non-specific binding events, POPC concentration was increased (83% w/w) to compensate for the absence of phosphoinositides. Cells expressing EGFP-tagged proteins were lysed and EGFP-tagged protein concentration was determined as described using Eqn 1. Serial dilutions of the EGFP-tagged proteins were then prepared and incubated with PI-containing or control liposomes. EGFP-tagged protein binding to liposomes was measured by flow cytometry, and background fluorescence was subtracted. The theoretical maximum fluorescence ( $F_{max}$ ) value was estimated by curve fitting:

$$F = \frac{F_{max}[P]}{[P] + K_d},$$

where  $F$  is the raw background-subtracted fluorescence value and  $[P]$  is protein concentration. Raw fluorescence values were then normalised to  $F_{max}$  to determine occupancy:

$$\theta = \frac{F}{F_{max}} = \frac{[P_{bound}]}{[PIP_{total}]},$$

where  $[P_{bound}]$  is the concentration of the protein bound to PIP and  $[PIP_{total}]$  is the total concentration of PIP at the vesicle. Finally, the  $K_d$  was calculated from the equation:

$$\theta = \frac{[P]}{[P] + K_d}.$$

### $K_d$ fitting for recombinant His-tagged talin FERM

The His-tagged talin FERM construct and its purification have been described elsewhere (Elliott et al., 2010). For use in ProLIF, recombinant His-tagged talin FERM was first labelled with Alexa-Fluor488-Maleimide (dye:protein ratio 1:10) overnight in 50 mM Tris pH 7.0, 150 mM NaCl, 600 μM TCEP and then dialysed overnight in 50 mM Tris pH 7.4, 150 mM NaCl, 600 μM TCEP. Binding to β1-integrin-containing proteoliposomes was measured after 2 h of incubation with the proteoliposomes at room temperature. For the fitting of the data, non-specific binding to control liposomes was first subtracted and the theoretical maximum fluorescence ( $F_{max}$ ) value was estimated in order to determine occupancy.

Occupancy was then plotted as a function of concentration and this was fitted against Hill's equation:

$$\theta = \frac{[P]^h}{(K_d + [P]^h)}$$

Where  $[P]$  is protein concentration and  $h$  is Hill's coefficient, which in the case of best fit was 1.368.

### Statistical analysis

No statistical method was used to predetermine sample size. Unless stated otherwise all experiments were repeated three or more times for data where representative images are shown and for others sufficient sample size was chosen to reach statistical significance. Statistical significance was determined using the Student's  $t$ -test (unpaired, two-tailed, unequal variance).  $n$  numbers are indicated in the figure legends. A  $P$ -value of 0.05 was considered as a cut-off for statistical significance.

### Acknowledgements

We thank P. Laasola and J. Siivonen for excellent technical assistance. H. Bousquet and C. Kikuti (Institut Curie) are acknowledged for technical help. The CIC facilities at Turku Centre for Biotechnology are acknowledged for their help with flow cytometry and the PROTEX facility at the University of Leicester for generating the Talin FERM-EGFP domain construct.

### Competing interests

The authors declare no competing or financial interests.

### Author contributions

Conceptualization: N.D.F., D.L., J.I.; Methodology: N.D.F., M.M., J.A., A.M., L.P., C.G., D.L., P.M.; Validation: N.D.F., M.M., J.A.; Formal analysis: N.D.F., M.M., J.A., L.P.; Investigation: N.D.F., M.M., J.A., A.M., L.P.; Resources: P.M., B.T.G., B.G., J.I.; Writing - original draft: N.D.F., H.H., J.I.; Writing - review & editing: N.D.F., M.M., H.H., L.P., D.L., B.T.G., J.I.; Visualization: N.D., M.M., H.H., J.I.; Supervision: D.L., B.G., J.I.; Project administration: J.I.; Funding acquisition: J.I.

### Funding

This study was supported by the Academy of Finland and European Research Council Consolidator Grant 615258 (J.I.). M.M. and N.D.F. were supported by the Drug Research Doctoral Program, University of Turku (Turun Yliopisto). Deposited into PMC for release after 6 months.

### Supplementary information

Supplementary information available online at <http://jcs.biologists.org/lookup/doi/10.1242/jcs.214270.supplemental>

### References

- Ahram, M., Litou, Z. I., Fang, R. and Al-Tawallbeh, G. (2006). Estimation of membrane proteins in the human proteome. *In Silico Biol.* **6**, 379-386.
- Almén, M. S., Nordström, K. J. V., Fredriksson, R. and Schiöth, H. B. (2009). Mapping the human membrane proteome: a majority of the human membrane proteins can be classified according to function and evolutionary origin. *BMC Biol.* **7**, 50.
- Ananthanarayanan, B., Stahelin, R. V., Digman, M. A. and Cho, W. (2003). Activation mechanisms of conventional protein kinase C isoforms are determined by the ligand affinity and conformational flexibility of their C1 domains. *J. Biol. Chem.* **278**, 46886-46894.
- Anthis, N. J., Wegener, K. L., Ye, F., Kim, C., Goult, B. T., Lowe, E. D., Vakonakis, I., Bate, N., Critchley, D. R., Ginsberg, M. H. et al. (2009). The structure of an integrin/talin complex reveals the basis of inside-out signal transduction. *EMBO J.* **28**, 3623-3632.
- Arinaminpathy, Y., Khurana, E., Engelman, D. M. and Gerstein, M. B. (2009). Computational analysis of membrane proteins: the largest class of drug targets. *Drug Discov. Today* **14**, 1130-1135.
- Beseničar, M., Maček, P., Lakey, J. H. and Anderluh, G. (2006). Surface plasmon resonance in protein-membrane interactions. *Chem. Phys. Lipids* **141**, 169-178.
- Bouvard, D., Pouwels, J., De Franceschi, N. and Ivaska, J. (2013). Integrin inactivators: balancing cellular functions in vitro and in vivo. *Nat. Rev. Mol. Cell Biol.* **14**, 430-442.
- Calderwood, D. A., Campbell, I. D. and Critchley, D. R. (2013). Talins and kindlins: partners in integrin-mediated adhesion. *Nat. Rev. Mol. Cell Biol.* **14**, 503-517.

- Ceccato, L., Chicanne, G., Nahoum, V., Pons, V., Payrastra, B., Gaits-iacovoni, F. and Viaud, J. (2016). PLIF: a rapid, accurate method to detect and quantitatively assess protein-lipid interactions. *Sci. Signal.* **9**, rs2.
- Cullen, P. J. (2008). Endosomal sorting and signalling: an emerging role for sorting nexins. *Nat. Rev. Mol. Cell Biol.* **9**, 574-582.
- Elliott, P. R., Goult, B. T., Kopp, P. M., Bate, N., Grossmann, J. G., Roberts, G. C. K., Critchley, D. R. and Barsukov, I. L. (2010). The structure of the talin head reveals a novel extended conformation of the FERM domain. *Structure* **18**, 1289-1299.
- Garcia, P., Gupta, R., Shah, S., Morris, A. J., Rudge, S. A., Scarlata, S., Petrova, V., McLaughlin, S. and Rebecchi, M. J. (1995). The pleckstrin homology domain of phospholipase C-delta 1 binds with high affinity to phosphatidylinositol 4,5-bisphosphate in bilayer membranes. *Biochemistry* **34**, 16228-16234.
- Gaullier, J.-M., Rønning, E., Gillooly, D. J. and Stenmark, H. (2000). Interaction of the EEA1 FYVE finger with phosphatidylinositol 3-phosphate and early endosomes. Role of conserved residues. *J. Biol. Chem.* **275**, 24595-24600.
- Geertsma, E. R., Nik Mahmood, N. A. B., Schuurman-Wolters, G. K. and Poolman, B. (2008). Membrane reconstitution of ABC transporters and assays of translocator function. *Nat. Protoc.* **3**, 256-266.
- Gillooly, D. J., Morrow, I. C., Lindsay, M., Gould, R., Bryant, N. J., Gaullier, J. M., Parton, R. G. and Stenmark, H. (2000). Localization of phosphatidylinositol 3-phosphate in yeast and mammalian cells. *EMBO J.* **19**, 4577-4588.
- Kojima, T., Fukuda, M., Watanabe, Y., Hamazato, F. and Mikoshiba, K. (1997). Characterization of the pleckstrin homology domain of btk as an inositol polyphosphate and phosphoinositide binding domain. *Biochem. Biophys. Res. Commun.* **236**, 333-339.
- Kolena, J. (1989). Functional reconstitution of rat ovarian LH/hCG receptor into proteoliposomes. *FEBS Lett.* **250**, 425-428.
- Lacapère, J.-J., Delavoie, F., Li, H., Péranzi, G., Maccario, J., Papadopoulos, V. and Vidic, B. (2001). Structural and functional study of reconstituted peripheral benzodiazepine receptor. *Biochem. Biophys. Res. Commun.* **284**, 536-541.
- Lemmon, M. A. (2008). Membrane recognition by phospholipid-binding domains. *Nat. Rev. Mol. Cell Biol.* **9**, 99-111.
- Lemmon, M. A. and Ferguson, K. M. (2000). Signal-dependent membrane targeting by pleckstrin homology (PH) domains. *Biochem. J.* **350**, 1-18.
- Lemmon, M. A., Ferguson, K. M., O'Brien, R., Sigler, P. B. and Schlessinger, J. (1995). Specific and high-affinity binding of inositol phosphates to an isolated pleckstrin homology domain. *Proc. Natl. Acad. Sci. USA* **92**, 10472-10476.
- Moriyama, Y., Takano, T. and Ohkuma, S. (1984). Solubilization and reconstitution of a lysosomal H<sup>+</sup>-pump. *J. Biochem.* **96**, 927-930.
- Mouro-Chanteloup, I., Cochet, S., Chami, M., Genetet, S., Zidi-Yahiaoui, N., Engel, A., Colin, Y., Bertrand, O. and Ripoché, P. (2010). Functional reconstitution into liposomes of purified human RhCG ammonia channel. *PLoS ONE* **5**, e8921.
- Müller, D. J., Wu, N. and Palczewski, K. (2008). Vertebrate membrane proteins: structure, function, and insights from biophysical approaches. *Pharmacol. Rev.* **60**, 43-78.
- Nesper, J., Brosig, A., Ringler, P., Patel, G. J., Müller, S. A., Kleinschmidt, J. H., Boos, W., Diederichs, K. and Welte, W. (2008). Omp85(tt) from thermus thermophilus HB27: an ancestral type of the Omp85 protein family. *J. Bacteriol.* **190**, 4568-4575.
- Neves, P., Lopes, S. C. D. N., Sousa, I., Garcia, S., Eaton, P. and Gameiro, P. (2009). Characterization of membrane protein reconstitution in LUVs of different lipid composition by fluorescence anisotropy. *J. Pharm. Biomed. Anal.* **49**, 276-281.
- Pearce, L. R., Komander, D. and Alessi, D. R. (2010). The nuts and bolts of AGC protein kinases. *Nat. Rev. Mol. Cell Biol.* **11**, 9-22.
- Rameh, L. E., Arvidsson, A.-K., Carraway, K. L., Couvillon, A. D., Rathbun, G., Crompton, A., VanRenterghem, B., Czech, M. P., Ravichandran, K. S., Burakoff, S. J. et al. (1997). A comparative analysis of the phosphoinositide binding specificity of pleckstrin homology domains. *J. Biol. Chem.* **272**, 22059-22066.
- Richard, P., Rigaud, J.-L. and Gräber, P. (1990). Reconstitution of CF0F1 into liposomes using a new reconstitution procedure. *Eur. J. Biochem.* **193**, 921-925.
- Rigaud, J.-L., Pitard, B. and Levy, D. (1995). Reconstitution of membrane proteins into liposomes: application to energy-transducing membrane proteins. *Biochim. Biophys. Acta* **1231**, 223-246.
- Rossier, O., Octeau, V., Sibarita, J.-B., Leduc, C., Tessier, B., Nair, D., Gatterdam, V., Destaing, O., Albignès-Rizo, C., Tampé, R. et al. (2012). Integrins  $\beta 1$  and  $\beta 3$  exhibit distinct dynamic nanoscale organizations inside focal adhesions. *Nat. Cell Biol.* **14**, 1057-1067.
- Saliba, A.-E., Vonkova, I., Ceschia, S., Findlay, G. M., Maeda, K., Tischer, C., Deghou, S., van Noort, V., Bork, P., Pawson, T. et al. (2014). A quantitative liposome microarray to systematically characterize protein-lipid interactions. *Nat. Methods* **11**, 47-50.
- Smith, S. A. and Morrissey, J. H. (2004). Rapid and efficient incorporation of tissue factor into liposomes. *J. Thromb. Haemost.* **2**, 1155-1162.
- Song, A., Zhang, J., Zhang, M., Shen, T. and Tang, J. (2000). Spectral properties and structure of fluorescein and its alkyl derivatives in micelles. *Colloids Surf. A Physicochem. Eng. Asp.* **167**, 253-262.
- Stenmark, H., Aasland, R. and Driscoll, P. C. (2002). The phosphatidylinositol 3-phosphate-binding FYVE finger. *FEBS Lett.* **513**, 77-84.
- Temmerman, K. and Nickel, W. (2009). A novel flow cytometric assay to quantify interactions between proteins and membrane lipids. *J. Lipid Res.* **50**, 1245-1254.
- Winograd-Katz, S. E., Fässler, R., Geiger, B. and Legate, K. R. (2014). The integrin adhesome: from genes and proteins to human disease. *Nat. Rev. Mol. Cell Biol.* **15**, 273-288.
- Worrall, J. A. R. and Mason, J. M. (2011). Thermodynamic analysis of jun-fos coiled coil peptide antagonists. *FEBS J.* **278**, 663-672.
- Wu, H.-J., Henzie, J., Lin, W.-C., Rhodes, C., Li, Z., Sartorel, E., Thorner, J., Yang, P. and Groves, J. T. (2012). Membrane-protein binding measured with solution-phase plasmonic nanocube sensors. *Nat. Methods* **9**, 1189-1191.
- Young, H. S., Rigaud, J. L., Lacapère, J. J., Reddy, L. G. and Stokes, D. L. (1997). How to make tubular crystals by reconstitution of detergent-solubilized Ca2(+)-ATPase. *Biophys. J.* **72**, 2545-2558.
- Zhang, X.-F., Zhang, J. and Liu, L. (2014). Fluorescence properties of twenty fluorescein derivatives: lifetime, quantum yield, absorption and emission spectra. *J. Fluoresc.* **24**, 819-826.
- Zhao, H. and Lappalainen, P. (2012). A simple guide to biochemical approaches for analyzing protein-lipid interactions. *Mol. Biol. Cell* **23**, 2823-2830.
